# Supplementary material for: A Randomized Trial of Vertebroplasty for Painful Osteoporotic Vertebral Fractures
Source: Atypon-hosted journal article supplement (doi:10.1056/nejmoa0900429), 2009-08-05
Supplement: nejm_buchbinder_557sa1.pdf [file nejm_buchbinder_557sa1.pdf]

## Supplementary Appendix

This appendix has been provided by the authors to give readers additional information about their work.

Supplement to: Buchbinder R, Osborne RH, Ebeling PR, et al. A randomized trial of vertebroplasty for painful osteoporotic vertebral fractures. *N Engl J Med* 2009;361:557-68.

**Web Supplementary Table 1. Baseline characteristics of participants\***

|                                                         | <b>Vertebroplasty<br/>(n=38)</b> | <b>Placebo<br/>(n=40)</b> |
|---------------------------------------------------------|----------------------------------|---------------------------|
| Age, years, mean (SD)                                   | 74.2 (14.0)                      | 78.9 (9.5)                |
| Female, N (%)                                           | 31 (82)                          | 31 (78)                   |
| Median (IQR) duration back pain, weeks                  | 9 (3.8 – 13)                     | 9.5 (3 – 17)              |
| Duration symptoms <6 weeks, n (%)                       | 12 (32)                          | 13 (32)                   |
| Body mass index (BMI), (kg/m <sup>2</sup> ), mean (SD)  | 25.6 (5.5)                       | 24.6 (5.7)                |
| Smoking status, N (%)                                   |                                  |                           |
| Never                                                   | 20 (53)                          | 12 (33)                   |
| Former                                                  | 14 (37)                          | 24 (60)                   |
| Current                                                 | 4 (10)                           | 3 (7)                     |
| Alcohol use, N (%)                                      |                                  |                           |
| Never                                                   | 8 (21)                           | 12 (30)                   |
| Sometimes                                               | 17 (45)                          | 18 (45)                   |
| Daily                                                   | 13 (34)                          | 10 (25)                   |
| Median duration (IQR) corticosteroids, years            | (n = 12) 3 (0.3 - 10.8)          | (n = 17) 2 (0.3 – 12 .5)  |
| Overall pain, mean (SD) (0 - 10, 10=worst pain)         | 7.4 (2.1)                        | 7.1 (2.3)                 |
| Pain at rest, mean (SD) (0 - 10, 10=worst pain)         | 4.5 (2.3)                        | 4.8 (2.8)                 |
| Pain in bed at night (0 - 10, 10=worst pain), mean (SD) | 4.8 (3.0)                        | 3.6 (3.2)                 |

|                                                                         |           |             |                       |
|-------------------------------------------------------------------------|-----------|-------------|-----------------------|
| QUALEFFO total score, mean (SD) (0 – 100,<br>100=worst quality of life) |           | 56.9 (13.4) | 59.6 (17.1)           |
| Pain                                                                    |           | 72.2 (17.3) | 72.1 (16.5)           |
| Physical function                                                       |           | 50.2 (17.7) | 54.3 (22.9)           |
| Leisure, social activities                                              |           | 66.3 (21.8) | 74.3 (23.1)           |
| General health perception                                               |           | 78.9 (17.3) | 78.1 (16.7)           |
| Mental function                                                         |           | 44.3 (15.9) | 44.3 (17.7)           |
| AQoL, mean (SD) (-0.04 – 1.0, 1=perfect health)                         |           | 0.33 (0.25) | 0.27 (0.26)           |
| Roland Morris, mean (SD) (0 - 23, 23=worst function)                    | (n = 30)^ | 17.3 (2.8)  | (n = 29)^ 17.3 (2.9)  |
| EQ5D (0 – 1, 1 = perfect health), mean (SD)                             | (n = 30)^ | 0.30 (0.32) | (n = 29)^ 0.28 (0.33) |
| Timed up and go test, seconds, mean (SD)                                | (n = 36)  | 20.5 (8.8)  | (n = 37) 23.9 (13.8)  |
| <hr/>                                                                   |           |             |                       |
| Taking any medication for osteoporosis, N (%)                           |           | 35 (92)     | 37 (93)               |
| Calcium supplements                                                     |           | 27 (71)     | 25 (63)               |
| Vitamin D                                                               |           | 14 (37)     | 18 (45)               |
| Bisphosphonates                                                         |           | 31 (82)     | 32 (82)               |
| Previous fractures, N (%)                                               |           | 25 (66)     | 25 (63)               |
| Spine                                                                   |           | 18 (47)     | 21 (53)               |
| Hip                                                                     |           | 5 (13)      | 3 (8)                 |
| Wrist                                                                   |           | 7 (18)      | 7 (18)                |
| Ribs                                                                    |           | 8 (21)      | 6 (15)                |

|                                           |                  |                  |
|-------------------------------------------|------------------|------------------|
| Other†                                    | 10 (26)          | 13 (33)          |
| Taking opioids for pain, N (%)            | 30 (75)          | 34 (89)          |
| Lumbar BMD T score < -2.5 SD, N (%)       | (n = 34) 21 (62) | (n = 28) 21 (75) |
| Femoral neck BMD T score < -2.5 SD, N (%) | (n = 34) 13 (38) | (n = 28) 15 (54) |
| Fracture appearance, N (%)                | (N = 45)         | (N = 47)         |
| Biconcave                                 | 4 (9)            | 4 (9)            |
| Crush                                     | 6 (13)           | 10 (21)          |
| Wedge                                     | 35 (78)          | 33 (70)          |
| Severity of fracture, N (%) <sup>+</sup>  | (N = 45)         | (N = 47)         |
| Mild                                      | 13 (29)          | 12 (25)          |
| Moderate                                  | 21 (47)          | 24 (51)          |
| Severe                                    | 11 (24)          | 11 (23)          |
| Number of vertebral bodies treated, N (%) |                  |                  |
| 1                                         | 31 (82)          | 33 (83)          |
| 2                                         | 7 (18)           | 7 (17)           |

---

\*no significant difference between groups for any of the measured variables

^Roland Morris and EQ5D were added to protocol in June 2005 (to be comparable to outcomes used in another trial (36)

†includes arm, leg, pelvis, shoulder, clavicle

+Genant semi quantitative technique (20)

**Web Supplementary Table 2. Further outcomes of the study participants at 1 week, 1, 3 and 6 months by treatment group**

| Outcome measure   | 1 week           |                   | 1 month           |                  |                   |                  | 3 months         |                   |                   | 6 months         |                   |                    |
|-------------------|------------------|-------------------|-------------------|------------------|-------------------|------------------|------------------|-------------------|-------------------|------------------|-------------------|--------------------|
|                   |                  |                   | Adjusted          |                  | Adjusted          |                  | Adjusted         |                   |                   | Adjusted         |                   |                    |
|                   | Mean (SD) change |                   | between group     |                  | Mean (SD) change  |                  | between group    |                   | Mean (SD) change  |                  |                   | between group      |
|                   |                  |                   | Mean              |                  |                   |                  | Mean             |                   |                   | Mean             |                   |                    |
|                   |                  |                   | difference‡       |                  |                   |                  | difference‡      |                   |                   | difference‡      |                   |                    |
|                   | Active<br>(n=37) | Placebo<br>(n=37) | (95% CI)          | Active<br>(n=35) | Placebo<br>(n=38) | (95% CI)         | Active<br>(n=35) | Placebo<br>(n=36) | (95% CI)          | Active<br>(n=34) | Placebo<br>(n=35) | (95% CI)           |
| QUALEFFO          |                  |                   |                   |                  |                   |                  |                  |                   |                   |                  |                   |                    |
| Subscales         |                  |                   |                   |                  |                   |                  |                  |                   |                   |                  |                   |                    |
| Pain              | 7.8 (20.5)       | 16.1 (23.1)       | -8.5 (-18.2, 1.1) | 14.8 (21.2)      | 19.3 (27.7)       | -4 (-15.1, 7.1)  | 18.1 (21.1)      | 21.1 (30.6)       | -2.7 (-14.5, 9.1) | 20.4 (25)        | 20.7 (25)         | -0.5 (-11.2, 10.2) |
| Physical function | -1.1 (8.8)       | 1.8 (10.3)        | -2.7 (-7.1, 1.6)  | 2.6 (10.0)       | 1.5 (14.8)        | 1.6 (-4.5, 7.6)  | 8.2 (12.3)       | 6.7 (17.4)        | 2.5 (-3.9, 8.9)   | 7.6 (17.6)       | 6.2 (17.6)        | 2.1 (-4.9, 9.0)    |
| Leisure, social   | -3.5 (17.3)      | 3.3 (15.2)        | -4.8 (-11.9, 2.4) | -2.7 (15.7)      | 0.7 (17.5)        | -1.7 (-9.3, 5.8) | 0.8 (20.0)       | 2.7 (16.6)        | -0.1 (-8.2, 8)    | 2.8 (18.8)       | 8.0 (18.8)        | -3.0 (-11.3, 5.3)  |
| General health    | 2.9 (15.2)       | 4.1 (15.8)        | -2.1 (-8.9, 4.8)  | 3.6 (18.9)       | -2.0 (15.4)       | 5.4 (-2, 12.7)   | 7.2 (17.3)       | 2.3 (17.2)        | 5.1 (-2.4, 12.6)  | 5.0 (16.8)       | 1.9 (16.8)        | 2.4 (-5.4, 10.1)   |
| Mental function   | -3.1 (12.5)      | -0.4 (14.2)       | -2.6 (-8.7, 3.5)  | -0.8 (16.0)      | -3.9 (14.4)       | 3.1 (-3.6, 9.8)  | -1.9 (12.9)      | -1.1 (17)         | -0.6 (-7.2, 6)    | -1.3 (15.1)      | -3.2 (15.1)       | 1.5 (-5.7, 8.6)    |

| <b>Perceived change</b> | <b>N (%)</b> | <b>N (%)</b> | <b>Relative risk*</b> | <b>N (%)</b> | <b>N (%)</b> | <b>Relative risk*</b> | <b>N (%)</b> | <b>N (%)</b> | <b>Relative risk*</b> | <b>N (%)</b> | <b>N (%)</b> | <b>Relative risk*</b> |
|-------------------------|--------------|--------------|-----------------------|--------------|--------------|-----------------------|--------------|--------------|-----------------------|--------------|--------------|-----------------------|
| <b>Fatigue</b>          |              |              |                       |              |              |                       |              |              |                       |              |              |                       |
| Better <sup>#</sup>     | 7 (19)       | 4 (11)       | 1.8 (0.6 – 5.5)       | 7 (20)       | 7 (18)       | 1.1 (0.4 – 2.8)       | 7 (19)       | 6 (16)       | 1.2 (0.4 – 3.2)       | 8 (23)       | 13 (36)      | 0.6 (0.3 – 1.3)       |
| No change               | 25 (68)      | 28 (76)      |                       | 24 (69)      | 23 (61)      |                       | 23 (64)      | 22 (60)      |                       | 21 (60)      | 15 (42)      |                       |
| Worse <sup>#</sup>      | 5 (13)       | 5 (13)       |                       | 4 (11)       | 8 (21)       |                       | 6 (17)       | 9 (24)       |                       | 6 (17)       | 8 (22)       |                       |
| <b>Overall health</b>   |              |              |                       |              |              |                       |              |              |                       |              |              |                       |
| Better <sup>#</sup>     | 4 (11)       | 8 (22)       | 0.5 (0.1 – 1.5)       | 8 (23)       | 9 (24)       | 1.0 (0.4 – 2.2)       | 6 (17)       | 9 (24)       | 0.7 (0.3 – 1.7)       | 11 (32)      | 15 (42)      | 0.7 (0.4 – 1.4)       |
| No change               | 30 (81)      | 27 (73)      |                       | 25 (71)      | 22 (58)      |                       | 25 (69)      | 21 (57)      |                       | 19 (54)      | 13 (36)      |                       |
| Worse <sup>#</sup>      | 3 (8)        | 2 (5)        |                       | 2 (6)        | 7 (18)       |                       | 6 (17)       | 7 (19)       |                       | 5 (14)       | 8 (22)       |                       |
| <b>Change in pain</b>   |              |              |                       |              |              |                       |              |              |                       |              |              |                       |
| <b>Overall Pain</b>     |              |              |                       |              |              |                       |              |              |                       |              |              |                       |
| <2.5 units              | 23 (62)      | 23 (62)      | 1.0 (0.6, 1.8)        | 17 (49)      | 22 (58)      | 1.2 (0.7, 2.0)        | 17 (47)      | 24 (65)      | 1.5 (0.9, 2.6)        | 16 (46)      | 21 (58)      | 1.3 (0.8 – 2.1)       |
| ≥ 2.5 units             | 14 (38)      | 14 (38)      |                       | 18 (51)      | 16 (42)      |                       | 19 (53)      | 13 (35)      |                       | 19 (54)      | 15 (42)      |                       |
| <b>Pain at rest</b>     |              |              |                       |              |              |                       |              |              |                       |              |              |                       |
| <2.5 units              | 30 (81)      | 25 (68)      | 0.6 (0.3, 1.3)        | 24 (69)      | 24 (63)      | 0.9 (0.4, 1.6)        | 23 (64)      | 26 (70)      | 1.2 (0.7, 2.3)        | 20 (57)      | 21 (58)      | 1.0 (0.6 – 1.8)       |
| ≥ 2.5 units             | 7 (19)       | 12 (32)      |                       | 11 (31)      | 14 (37)      |                       | 13 (36)      | 11 (30)      |                       | 15 (43)      | 15 (42)      |                       |
| <b>Pain at night</b>    |              |              |                       |              |              |                       |              |              |                       |              |              |                       |
| <2.5 units              | 28 (76)      | 29 (78)      | 1.1 (0.5, 2.6)        | 21 (60)      | 28 (74)      | 1.5 (0.8, 3.0)        | 26 (70)      | 23 (64)      | 1.2 (0.7, 2.3)        | 22 (63)      | 28 (78)      | 1.7 (0.8 – 3.5)       |
| ≥ 2.5 units             | 9 (24)       | 8 (22)       |                       | 14 (40)      | 10 (26)      |                       | 11 (30)      | 13 (36)      |                       | 13 (37)      | 8 (22)       |                       |

‡ From multiple linear regression analyses adjusted for stratification variables and baseline values. Positive values favor the active group.

\* Relative risk of being better compared with being unchanged or worse.

# Moderately or a great deal better or worse
